# Supplementary material for: A bio-inspired transpiration ion pump based on MXene
Source: Royal Society of Chemistry journal article supplement (doi:10.1039/d0qm00569j), 2020-01-01
Supplement: d0qm00569j1.pdf [file d0qm00569j1.pdf]

# Supporting information

## Bio-inspired Transpiration Ion Pump Based on MXene

### Experimental Section

#### **Fabrication of Lamellar MXene Membranes.**

1.3 g LiF (Aladdin) was dissolved in 25 mL HCl solution (9 M) and magnetic stirring for 15 min. Then, 0.5 g  $\text{Ti}_3\text{AlC}_2$  (200 mesh, Materials Research Centre, Ukraine) was slowly added in the solution over 30 min and then reacting at 37 °C for 24h. The resulting suspension was washed with DI water and centrifugated at 4000 rpm several times until the pH of the supernatant was ~ 6. The sediment was then dispersed into DI water with ultrasonication for 20 min. Finally, a colloidal solution of  $\text{Ti}_3\text{C}_2\text{T}_x$  MXene nanosheets were obtained after the suspension was centrifuged at 4000 rpm for 15 min. The MXene membranes were prepared by vacuum-assisted filtration of liquid exfoliated MXene solution with a certain amount on a polypropylene filter membrane (Celgard 2400) and then peeled off the substrate after drying.

#### **Characterization of MXene Nanosheets and Membranes.**

X-ray photoelectron spectroscopy (XPS) was gained by Physical Electronics PHI5802 instrument using a magnesium anode (monochromatic  $\text{K}\alpha$  X-rays at 253.6 eV) as the source. The binding energy in the XPS spectra was calibrated with a carbon signal (C 1s at 284.6 eV). Scanning electron microscopy (SEM) images of MXene membranes were taken with Hitachi S4800. Transmission electron microscopy (TEM) images were obtained using a JEOL JEM-2100F microscope with an acceleration voltage of 200 kV. X-ray diffraction patterns were carried out on DX-27 mini with Cu  $\text{K}\alpha$  radiation.

#### **Ion pump and energy conversion Measurement.**

The ion pump and energy conversion devices were conducted with a home-made apparatus with two reservoirs. A certain volume of electrolyte solution was filled in each reservoir. A piece of rectangular MXene membrane (15 mm × 8 mm) was placed flat and the two ends were in contact with each solution. Ag/AgCl electrodes were inserted into both reservoirs to measure zero-volt current and open circuit voltage under IR illumination. Zero-volt current and open circuit voltage were recorded by a Keithley 2400 instrument.

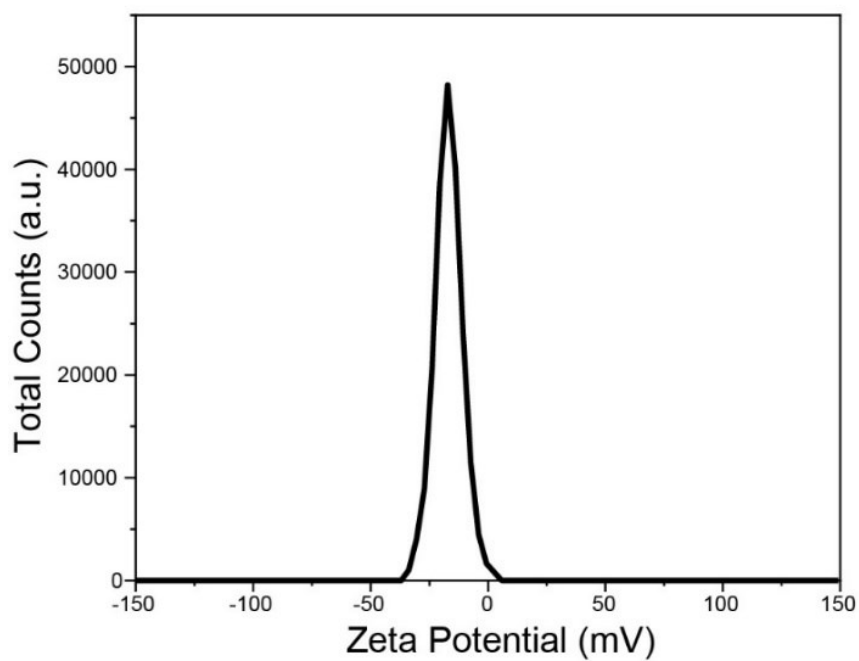

**Fig. S1.** Negative zeta potential of MXene nanosheets, confirming its negative surface charge (-20 mV).

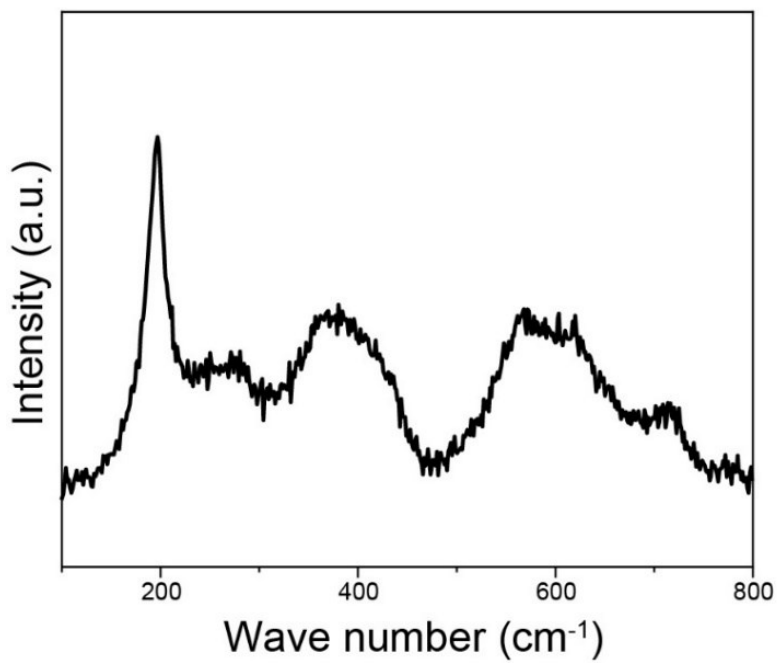

**Fig. S2.** Raman spectroscopy shows the main peaks of the MXene  $\text{Ti}_3\text{C}_2\text{Tx}$ .

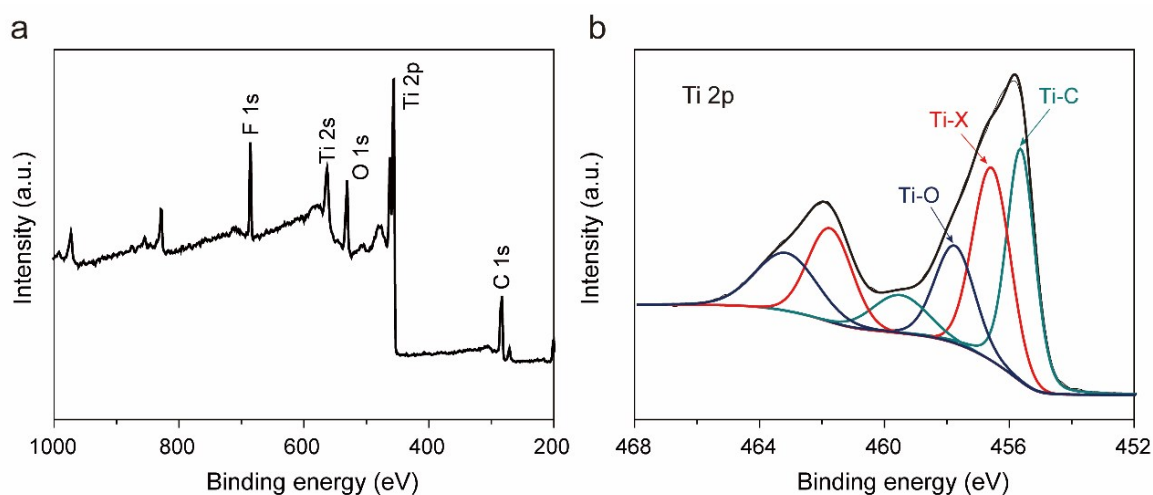

**Fig. S3.** XPS spectra of  $\text{Ti}_3\text{C}_2\text{T}_x$  nanosheets. **(a)** Full XPS spectrum and **(b)** High-resolution Ti 2p spectrum show the existence of C, Ti, O and F, indicating the formation of  $\text{Ti}_3\text{C}_2\text{T}_x$  MXene.

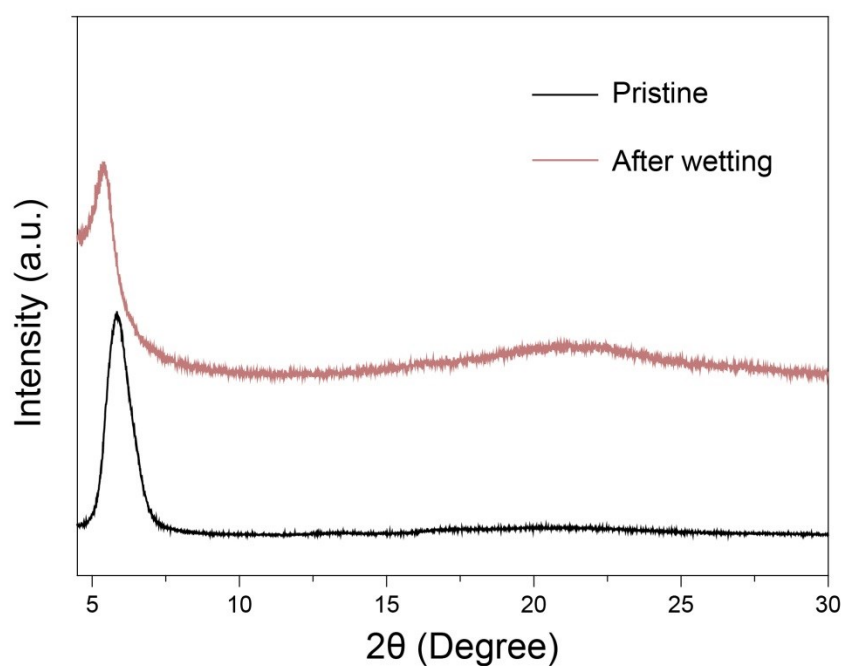

**Fig. S4.** X-ray diffraction patterns of  $\text{Ti}_3\text{C}_2\text{T}_x$  membranes under drying and after wetting, showing the (0002) peak shifted from  $5.8^\circ$  to  $5.4^\circ$  after water swelling.

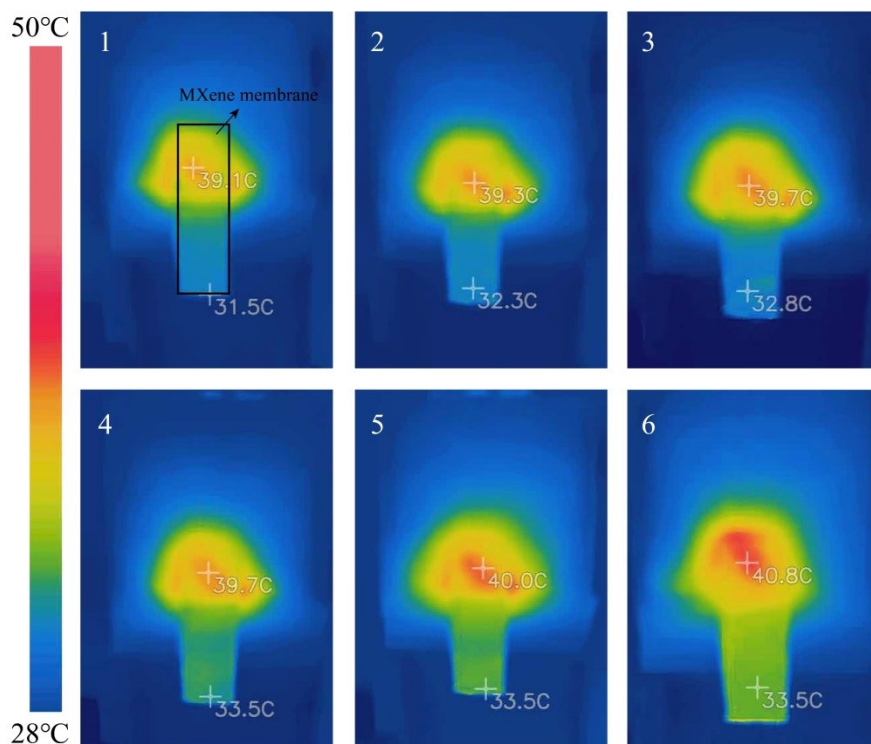

**Fig. S5.** IR thermal images of MXene  $\text{Ti}_3\text{C}_2\text{T}_x$  membrane when one side was radiated by  $600 \text{ mW/cm}^2$  power of IR illumination, showing a temperature difference of  $7.3^\circ\text{C}$  between the sides within 30min. MXene film was placed flat and the two ends were in contact with solutions in two reservoirs respectively.

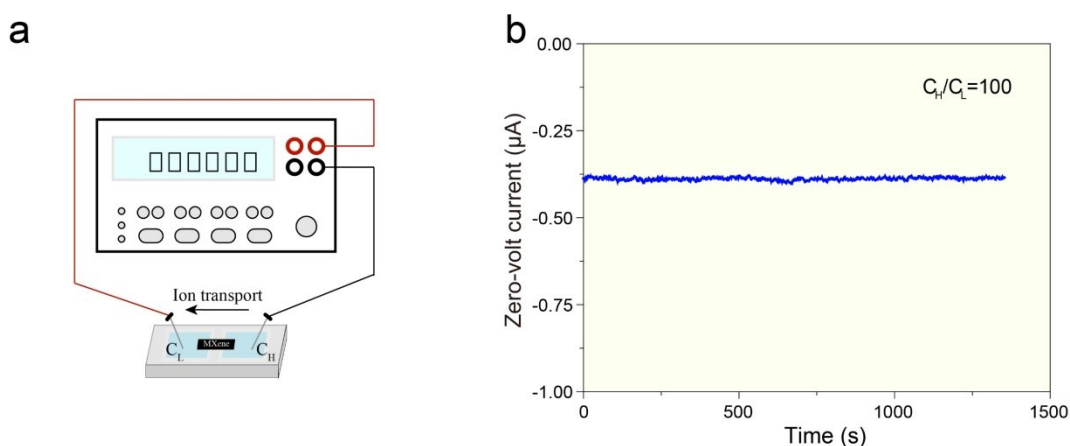

**Fig. S6.** Illustration of the appearance of ionic current. (a) Schematic of measurement. The positive (red) and negative (black) probes of Keithley 2400 were connected with Ag/AgCl electrodes that inserted into the left and right reservoirs. Ion diffusion current was measured at I-T mode when the left and right reservoirs were filled with solutions of  $C_L$  and  $C_H$ , respectively. (b) Ion diffusion current under 100-fold ( $C_H$

=0.01 M;  $C_L$  =0.0001 M) KCl concentration. <sup>41</sup>

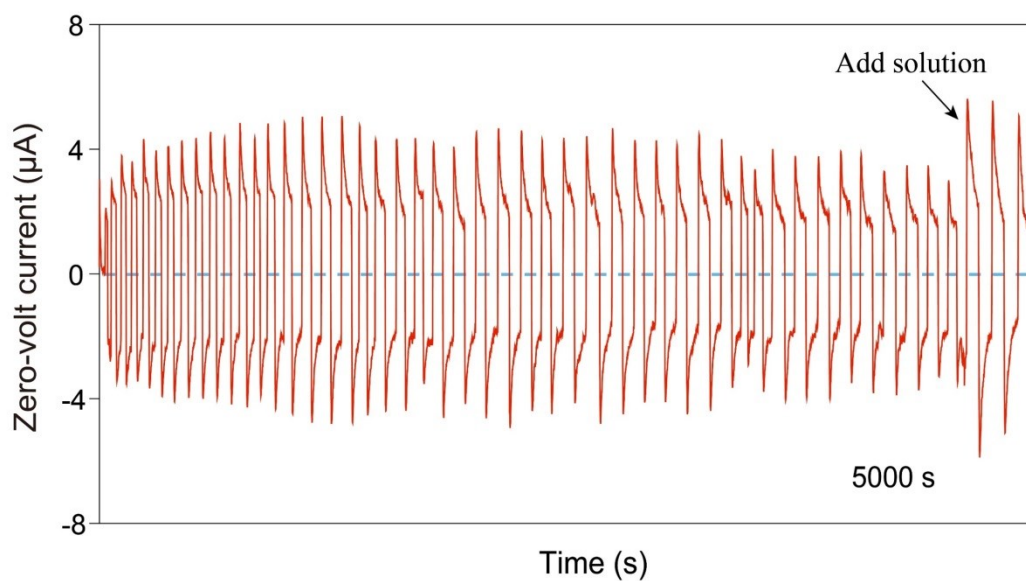

**Fig. S7.** Zero-volt current through  $\text{Ti}_3\text{C}_2\text{T}_x$  membrane within 5000 seconds when the illumination was applied to the left or right side of the membrane, showing the good stability and repeatability of ion pump device.

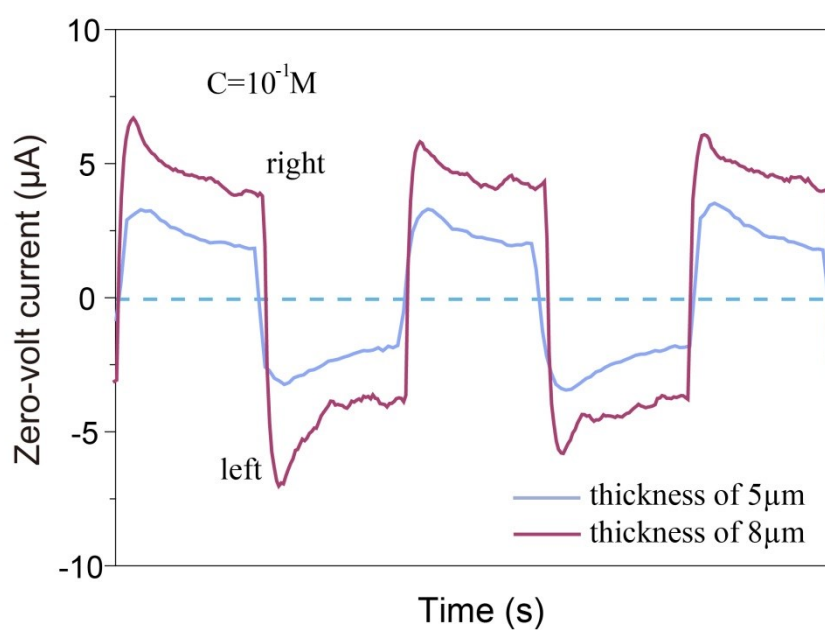

**Fig. S8.** The comparison of zero-volt current curves when the thickness of the  $\text{Ti}_3\text{C}_2\text{T}_x$  membrane is about 5  $\mu\text{m}$  and 8  $\mu\text{m}$ .

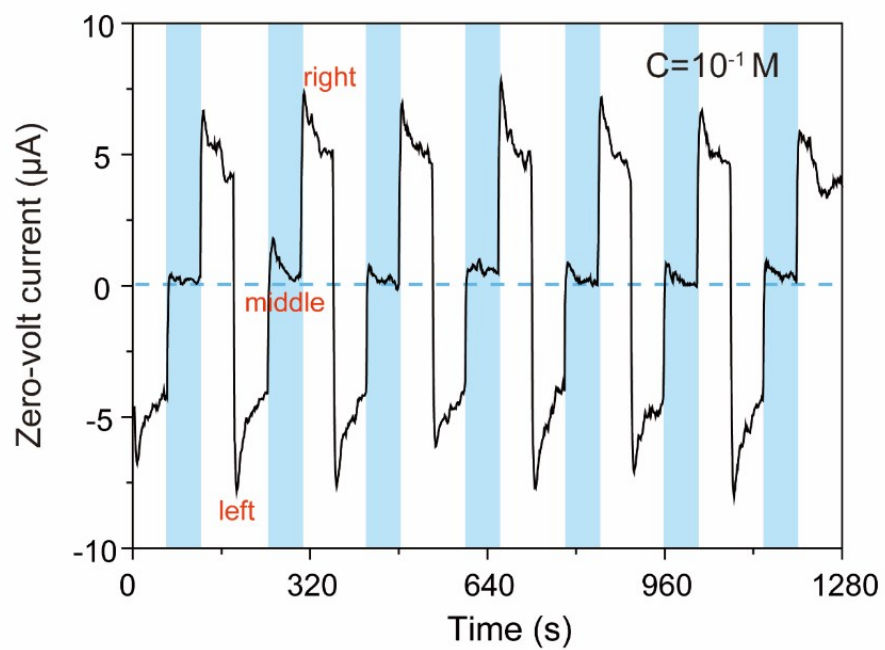

**Fig. S9.** Zero-volt current curves under several cycles when the light illumination was applied separately on different positions (left, middle and right) of MXene membrane.

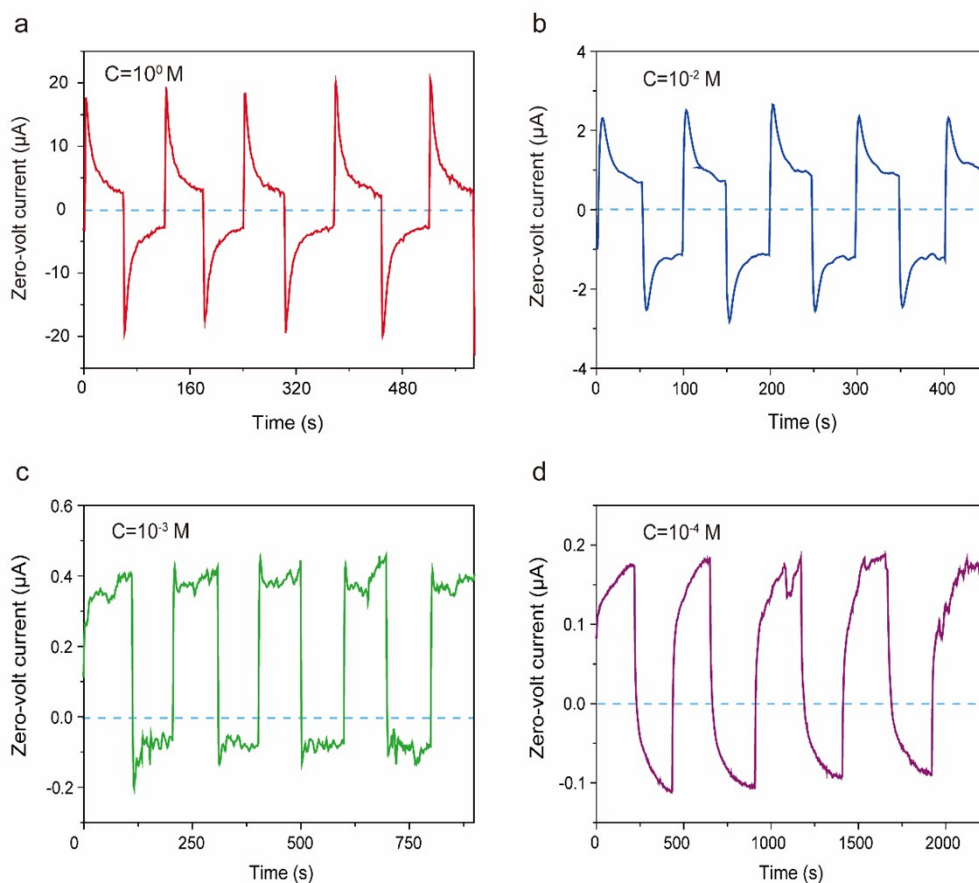

**Fig. S10.** Zero-volt current curves with different values and waveforms under different KCl concentrations. (a-d) The concentrations of KCl solution is  $10^0 \text{ M}$ ,  $10^{-2} \text{ M}$ ,  $10^{-3} \text{ M}$  and  $10^{-4} \text{ M}$  respectively.

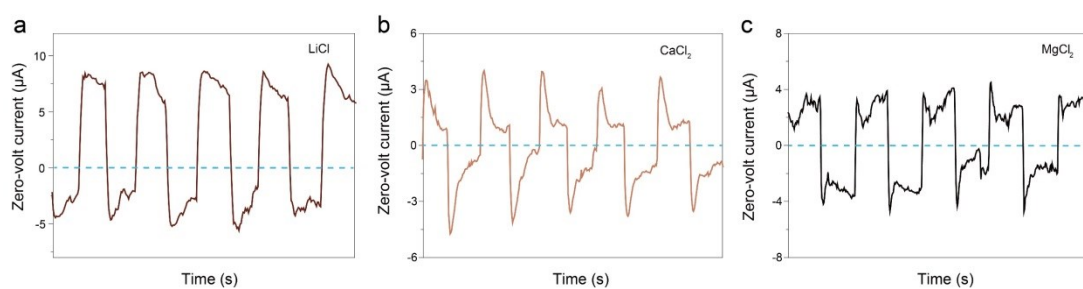

**Fig. S11.** Zero-volt current curves of  $\text{LiCl}$ ,  $\text{CaCl}_2$  and  $\text{MgCl}_2$  solution. The electrolyte solution concentrations were 0.1 M.

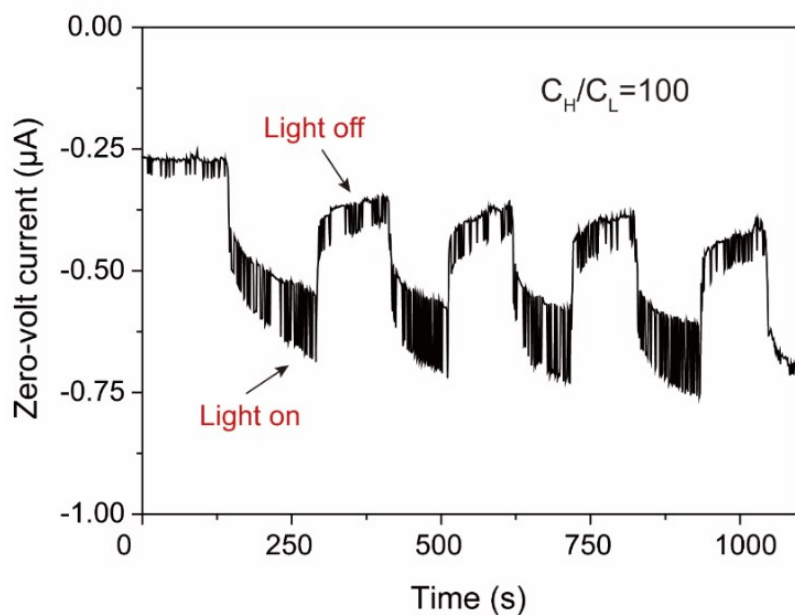

**Fig. S12.** Zero-volt current curves with the alternating light illumination at 100-fold ( $C_H=0.01$  M;  $C_L=0.0001$  M) KCl concentration. The illumination was applied to low concentration side.

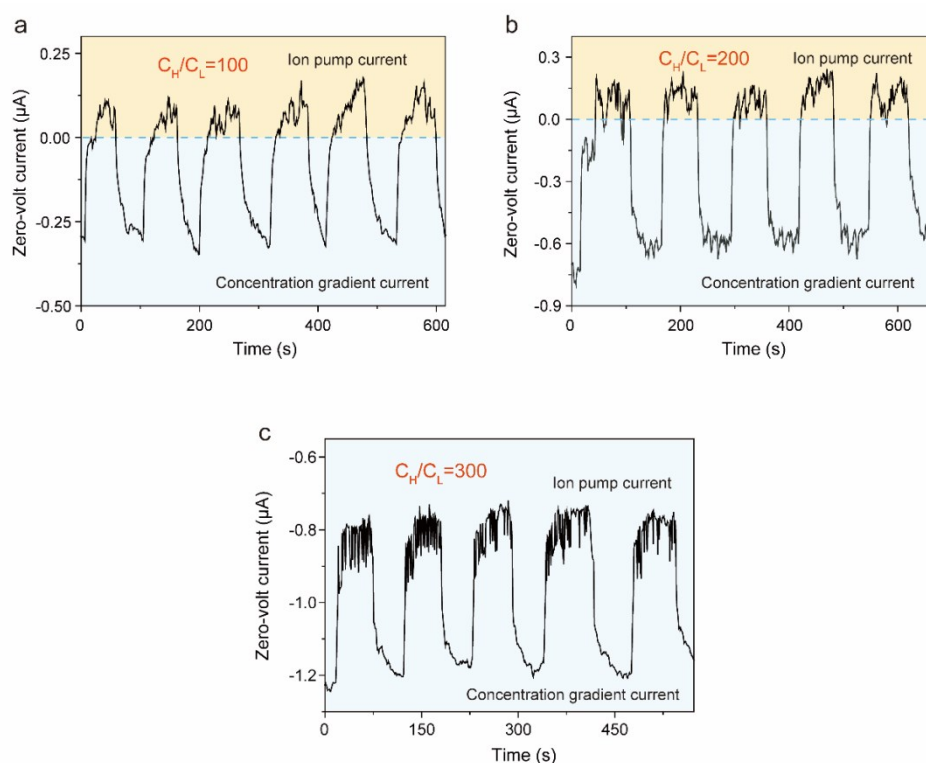

**Fig. S13.** Anti-gradient ion transport. Zero-volt current curves at KCl solution concentration gradient of (a) 100-fold, (b) 200-fold and (c) 300-fold upon regulated light intensity. The low concentration ( $C_L$ ) of KCl solution is 0.0001 M.
